# Supplementary material
Source: Springer Nature journal article supplement (https://www.springermedizin.de/resource/supplementary/12943_2011_933_MOESM6_ESM.pdf/9551706)

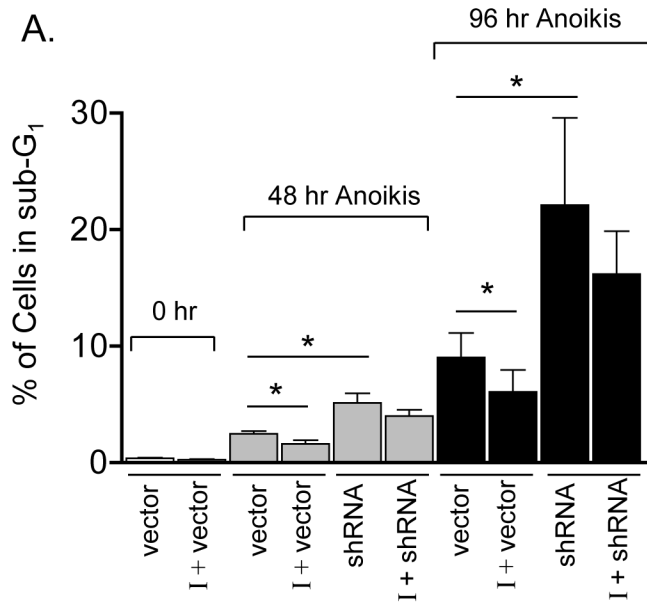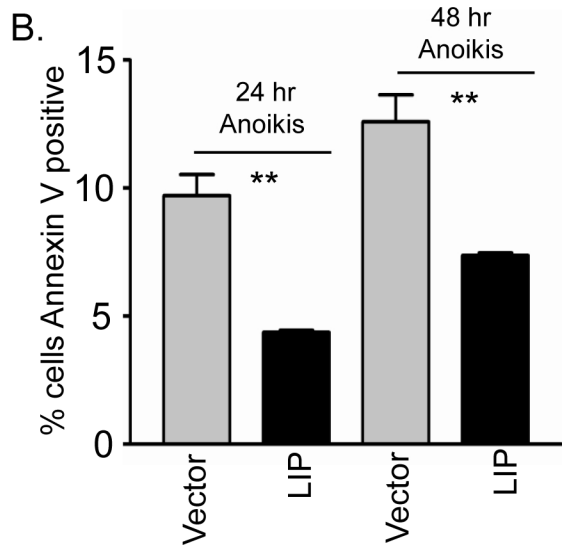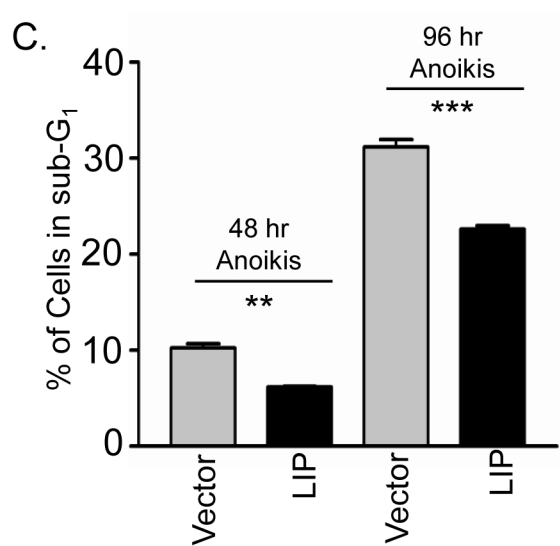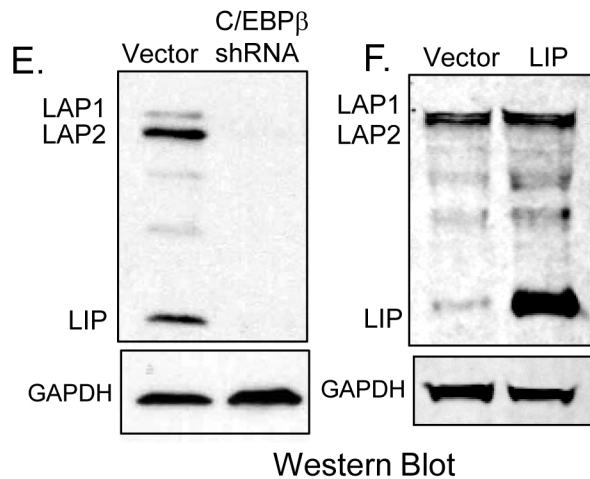

**D.** Anoikis / Clonogenic Assay

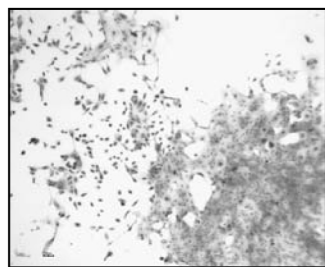

Vector + IGF

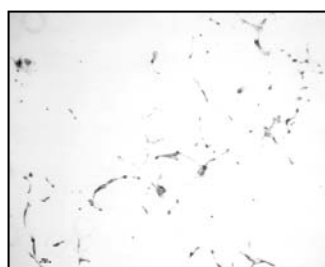

C/EBP $\beta$  shRNA + IGF

Supplement: MOESM6 [file 9551706]
